# Supplementary material for: Planning to be routine: habit as a mediator of the planning-behaviour relationship in healthcare professionals
Source: Springer Nature journal article supplement (doi:10.1186/s13012-017-0551-6), 2017-02-20
Supplement: MOESM2 [file 12082842]

## Improving the delivery of care for patients with type 2 diabetes

### Clinician Follow-up Questionnaire 2009

**1. What is your role within this General Practice? (Please circle)**

Practice nurse      Nurse Specialist (Specialty:.....)      Nurse Practitioner  
Nurse Prescriber      District Nurse      GP (Salaried)      GP (Partner)  
Other (please specify).....

**2. How long have you worked at this general practice?**      ..... Years      ..... Months

**Questions 3 & 4** ask about you **providing advice about weight management, both in general and over the past 12 months**, to patients with type 2 diabetes whose **BMI is above a target of 30 kg/m<sup>2</sup> even following previous management.**

**3. Is giving advice about weight management to patients with type 2 diabetes part of your clinical role?**       Yes **GO TO Q4**       No **GO TO Q5**

**4. Over the past 12 months, given 10 patients with diabetes whose BMI was above target, for how many did you provide advice about weight management? (Please circle one number)**

0    1    2    3    4    5    6    7    8    9    10

**Questions 5 & 6** ask about you **prescribing additional antihypertensive drugs, both in general and over the past 12 months**, for patients with type 2 diabetes whose blood pressure (BP) is **5mm Hg above a target of 140 mm Hg Systolic BP or 80 mm Hg Diastolic BP, even following previous management.**

**5. Is deciding to prescribe antihypertensive drugs to patients with type 2 diabetes part of your clinical role?**       Yes **GO TO Q6**       No **GO TO Q7**

**6. Over the past 12 months, given 10 patients with diabetes whose BP was 5 mm Hg above target, for how many did you prescribe an additional antihypertensive drug? (Please circle one number)**

0    1    2    3    4    5    6    7    8    9    10

**Questions 7 & 8** ask about you **examining the circulation and sensation in the feet, both in general and over the past 12 months**, of patients with type 2 diabetes registered with your practice,.

7. Is examining the circulation and sensation in the feet of patients with type 2 diabetes part of your clinical role?  Yes GO TO Q8  No GO TO Q9

8. Over the past 12 months, given 10 patients with diabetes, for how many did you *examine the circulation and sensation in their feet?* *(Please circle one number)*

0 1 2 3 4 5 6 7 8 9 10

**Questions 9 & 10** ask about you **providing advice about self-management, both in general and over the past 12 months**, to patients with type 2 diabetes registered with your practice.

9. Is providing advice about self-management to patients with diabetes part of your clinical role?  Yes GO TO Q10  No GO TO Q11

10. Over the past 12 months, given 10 patients with diabetes, for how many of these patients did you *provide advice about their self-management?* *(Please circle one number)*

0 1 2 3 4 5 6 7 8 9 10

**Questions 11 & 12** ask, both in general and over the past 12 months, about you **prescribing an additional therapy** for the management of HbA1c in patients with type 2 diabetes whose **HbA1c is higher than 8.0%** despite maximum dosage of two oral hypoglycaemic drugs.

11. Is deciding to prescribe additional therapy for patients with type 2 diabetes part of your clinical role?  Yes GO TO Q12  No GO TO Q13

12. Over the past 12 months, given 10 patients with diabetes whose HbA1c is above target, for how many did you *prescribe an additional therapy?* *(Please circle one number)*

0 1 2 3 4 5 6 7 8 9 10

**Questions 13 & 14** ask, both in general and over the past 12 months, about you **providing general education** to patients with type 2 diabetes registered with your practice.

13. Is providing general education to patients with type 2 diabetes part of your clinical role?  Yes GO TO Q14  No

14. Over the past 12 months, given 10 patients with diabetes, for how many did you *provide general education about diabetes?* *(Please circle one number)*

0 1 2 3 4 5 6 7 8 9 10

Thank you for completing this questionnaire.  
Please now return it to us in the pre-paid envelope provided.
